# Supplementary material for: Panhematopoietic RNA barcoding enables kinetic measurements of nucleate and anucleate lineages and the activation of myeloid clones following acute platelet depletion
Source: Springer Nature journal article supplement (doi:10.1186/s13059-023-02976-z), 2023-06-27

Fig. S5

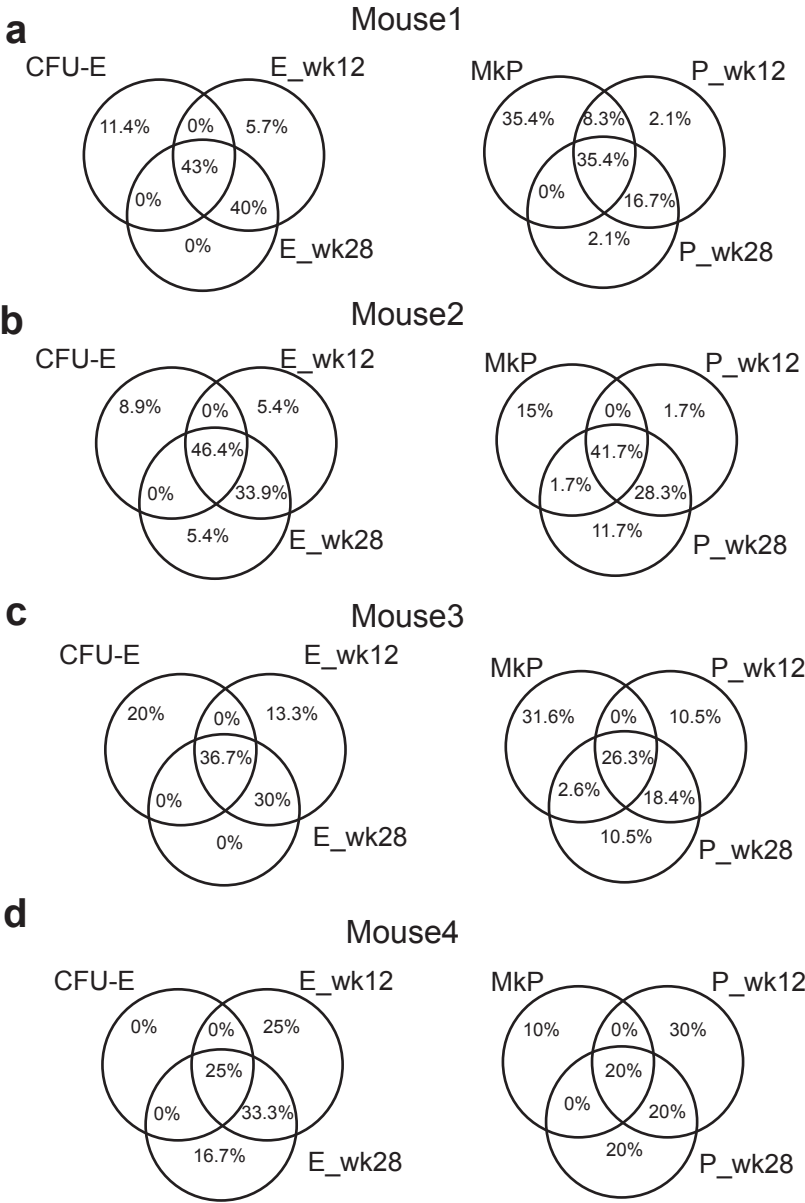

Supplement: MOESM10 [file 13059_2023_2976_MOESM10_ESM.pdf]
